# Supplementary material for: Uptake of Post-Exposure Prophylaxis among Nurses in the Kassena/Nankana Municipality of Northern Ghana. “A Health Belief Theory guided cross-sectional study”
Source: Research Square preprint supplement (doi:10.21203/rs.3.rs-6895146/v1), 2025-09-18
Supplement: Supplementary file 1 [file 90dc32e44d1e1b2914e67b45.docx]

**C.K. TEDAM UNIVERSITY OF TECHNOLOGY AND APPLIED SCIENCES**

**SCHOOL OF PUBLIC HEALTH**

**DEPARTMENT OF EPIDEMIOLOGY AND BIOSTATISTICS**

**INTRODUCTION OF RESEARCHER/RESEARCH TOPIC**

My name is Logonia Kingsley, a final-year postgraduate student at the above-mentioned university. I am conducting a study to explore the factors influencing the uptake of Post-Exposure Prophylaxis among nurses in the Kassena Nankana Municipality of Northern Ghana. This study is important because it will provide stakeholders with scientific information about the factors affecting nurses’ uptake of Post-Exposure Prophylaxis. This knowledge will enable stakeholders to make proactive decisions in managing nurses who are exposed to pathogenic organisms.

**STATEMENT OF CONFIDENTIALITY**

Once you agree to participate in this study, your personal information will not be shared with a third party. Any details you provide will be kept confidential and used solely for conducting and assessing this study. If there is ever a need to disclose information to a third party, we will ask for your permission beforehand.

**INFORMED CONSENT**

Pleasenote that this study is strictly voluntary, and you reserve the right to refuse consent.

The field worker will explain the purpose of the study to you and will only give you the questionnaire after you agree to participate in the study.

There will be no financial reward for this study.

Code of Participant……………… Signature……………….. Date…………………

**Contact information of the researcher**

Logonia Kingsley 0205646375


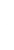


**SECTION 1. DEMOGRAPHIC CHARACTERISTICS**

***(Please kindly indicate by writing or ticking what applies to you)***

1. What type of Facility do you work in?

- Hospital
- Clinic

1.
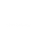

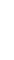

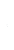

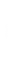
Age of respondent

- 18-24 years
- 25-34 years
- 35-44 years
- 45-54 years
- Above 55 years

1. Sex

- Male
- female

1. Religion

- Christian
- Muslim
- Traditionalist
- Others specify………………………………………………

1. Marital status:

- Married
- Unmarried

1. Level of Qualification

- Nurse Assistant
- Registered General Nurse
- Graduate Nurse
- Post Graduate Nurse

1. Years of Experience

- 1-5 years
- 6-10 years
- Above 10 years

1. Health status

- Bad
- Average
- Good

**HEALTH BELIEF MODEL QUESTIONNAIRE ON DETERMINANTS OF UPTAKE OF POST-EXPOSURE PROPHYLAXIS.**

**SECTION 2: NURSES' PERCEIVED SUSCEPTIBILITY TO INFECTIOUS BODILY FLUIDS. *(Kindly tick what applies to you.)***

1. To what extent do you agree that nurses working in the clinical setting have a greater chance of acquiring infectious diseases due to exposure to infectious bodily fluids?

- Strongly Disagree
- Disagree
- Neutral
- Agree
- Strongly Agree

1. Do you agree that the use of PPE greatly influences the chances of you getting exposed to infectious bodily fluids?

- Strongly Disagree
- Disagree
- Neutral
- Agree
- Strongly Agree

1. To what extent do you agree that the mere fact that you are a nurse increases your chances of acquiring infectious diseases?

- Strongly Disagree
- Disagree
- Neutral
- Agree
- Strongly Agree

1. Do you worry a lot about the possibility of acquiring an infectious disease as a result of exposure to infectious bodily fluids?

- Strongly Disagree
- Disagree
- Neutral
- Agree
- Strongly Agree

1. How do you rate the chances of your exposure to infectious bodily fluids within the next 1 year?

- Very likely
- Likely
- Rarely
- Not at all

**SECTION 3. NURSES’ PERCEIVED SEVERITY ASSOCIATED WITH EXPOSURE TO INFECTIOUS BODILY FLUIDS. *(Kindly tick what applies to you.)***

1. To what extent do you agree that the mere thought of occupational exposure to infectious bodily fluid scares nurses?

- Strongly Disagree
- Disagree
- Neutral
- Agree
- Strongly Agree

1. Do you agree that nurses’ exposure to infectious bodily fluids, if left untreated, can result in long-term disabilities?

- Strongly Disagree
- Disagree
- Neutral
- Agree
- Strongly Agree

1. Do you agree that those around you may be exposed to infectious diseases if nurses’ occupational exposures to infectious bodily fluids are left untreated?

- Strongly Disagree
- Disagree
- Neutral
- Agree
- Strongly Agree

1. To what extent do you agree that nurses go through pain, discomfort, and stigma when they are on PEP management for infectious disease exposure?

- Strongly Disagree
- Disagree
- Neutral
- Agree
- Strongly Agree

1. Do you believe that your financial security may be endangered if you acquire infections resulting from occupational exposure to infectious bodily fluids?

- Strongly Disagree
- Disagree
- Neutral
- Agree
- Strongly Agree

1. To what extent do you agree that your lifelong plans may be altered if you contract infectious diseases due to occupational exposure?

- Strongly Disagree
- Disagree
- Neutral
- Agree
- Strongly Agree

1. Do you agree that nurses' self-worth will be altered as a result of occupational exposure to infectious bodily fluids, leading to the acquisition of infectious diseases?

- Strongly Disagree
- Disagree
- Neutral
- Agree
- Strongly Agree

**SECTION 4. PERCEIVED BENEFITS ASSOCIATED WITH PEP SERVICES. *(Kindly tick what applies to you.)***

1. To what extent do you agree that the use of PEP services to prevent occupationally acquired diseases helps to reduce depression and psychological trauma among nurses?

- Strongly Disagree
- Disagree
- Neutral
- Agree
- Strongly Agree

1. Having good physical health now and in the future is enhanced when PEP services are initiated to help prevent occupationally acquired infections by nurses. Do you agree with this statement?

- Strongly Disagree
- Disagree
- Neutral
- Agree
- Strongly Agree

1. Do you agree that PEP services help nurses exposed to infectious diseases return to work peacefully and continue their careers?

- Strongly Disagree
- Disagree
- Neutral
- Agree
- Strongly Agree

1. To what extent do you agree that PEP services allow nurses to re-integrate successfully with their families and friends after exposure to infectious bodily fluids?

- Strongly Disagree
- Disagree
- Neutral
- Agree
- Strongly Agree

1. Do you believe that the timely initiation of PEP services can help reduce the financial consequences that are involved in managing occupationally acquired infectious diseases?

- Strongly Disagree
- Disagree
- Neutral
- Agree
- Strongly Agree

**SECTION 5. PERCEIVED BARRIERS THAT HINDER NURSES' ADHERENCE TO PEP SERVICES.** ***(Kindly tick what applies to you.)***

1. To what extent do you agree that PEP services can be accessed within 72 hours post-exposure to infectious bodily fluids?

- Strongly Disagree
- Disagree
- Neutral
- Agree
- Strongly Agree

1. Do you agree that the management of side effects of PEP services and drugs can be difficult and troubling?

- Strongly Disagree
- Disagree
- Neutral
- Agree
- Strongly Agree

1. To what extent do you believe that nurses' knowledge levels on PEP greatly influence their decision to utilize such services?

- Strongly Disagree
- Disagree
- Neutral
- Agree
- Strongly agree

1. To what extent do you agree that educational or training sessions regarding PEP services influence nurses' use of PEP?

- Strongly Disagree
- Disagree
- Neutral
- Agree
- Strongly Agree

1. To what extent do you agree that there is clarity and accessibility to policies on PEP services in your health facilities?

- Strongly Disagree
- Disagree
- Neutral
- Agree
- Strongly Agree

1. To what extent do you agree that personal protective equipment helps to reduce the overall burden and possibility of disease transmission during exposure to infectious bodily fluids?

- Strongly Disagree
- Disagree
- Neutral
- Agree
- Strongly Agree

**Section 6: Uptake of PEP Services**

***(Kindly indicate by ticking what applies to you.)***

1. Have you ever needed to use PEP services due to occupational exposure to bodily fluid?

- Yes
- No

1. If yes to question 1, what was the mechanism of exposure?

- Intact Skin
- Contact with the Mucosal Lining with a Sharp Needle, or bodily fluids

1. Did you go in for post-exposure prophylaxis?

- Yes
- No

1. What action did you take after the exposure?

- Washed the affected area with soap under running water
- Did not wash the affected area with soap under running water

1. What do you perceive as the cause of your exposure?

- Lack of PPE
- Lack of knowledge on the rational use of PPE
- Accidental
- Others (specify)…………………………………………………………………….

1. Did you report the nature of exposure to your supervisor for the needed action to be taken?

- Yes
- No

1. If yes, how satisfied were you with the support and process of obtaining PEP services?

- Very Dissatisfied
- Dissatisfied
- Neutral
- Very Satisfied

1. What factors do you think influence nurses’ willingness to recommend PEP services to colleagues? ***(Kindly tick all that apply to you.)***

- Lack of knowledge about PEP
- Fear of side effects
- Stigma associated with seeking PEP
- Organizational support for PEP promotion

Others specify………………………………………………………………….

…………………………………………………………………………………

1. Are you likely to recommend PEP services to a colleague?

- Very likely
- Likely
- Neutral
- Unlikely
- Very unlikely

**THANK YOU**
